# Supplementary material for: Investigation of the Allelopathic Effect of Two Invasive Plant Species in Rhizotron System
Source: MDPI journal article supplement (doi:10.3390/life14040475), 2024-04-04
Supplement: s1 [file s1]

# Investigation of the Allelopathic Effect of Two Invasive Plant Species in Rhizotron System

László Bakacsy <sup>1,\*</sup>, Luca Viktória Kardos <sup>1</sup>, Ágnes Szepesi <sup>1</sup>, Krisztina Napsugár Nagy <sup>1,2</sup>,  
Andrea Vasas <sup>3</sup> and Gábor Feigl <sup>1,\*</sup>

<sup>1</sup> Department of Plant Biology, Institute of Biology, Faculty of Science and Informatics, University of Szeged, Közép fasor 52, 6726 Szeged, Hungary; kardosluca0330@gmail.hu (L.V.K.); szepesia@bio.u-szeged.hu (Á.S.); krisznapi@gmail.com (K.N.N.)

<sup>2</sup> Doctoral School of Environmental Sciences, University of Szeged, Rerrich Béla tér 1, 6720 Szeged, Hungary

<sup>3</sup> Department of Pharmacognosy, Faculty of Pharmacy, University of Szeged, Eötvös u. 6, 6720 Szeged, Hungary; vasas.andrea@szte.hu

\* Correspondence: bakacsy@bio.u-szeged.hu (L.B.); feigl@bio.u-szeged.hu (G.F.)

**Supplementary Materials**

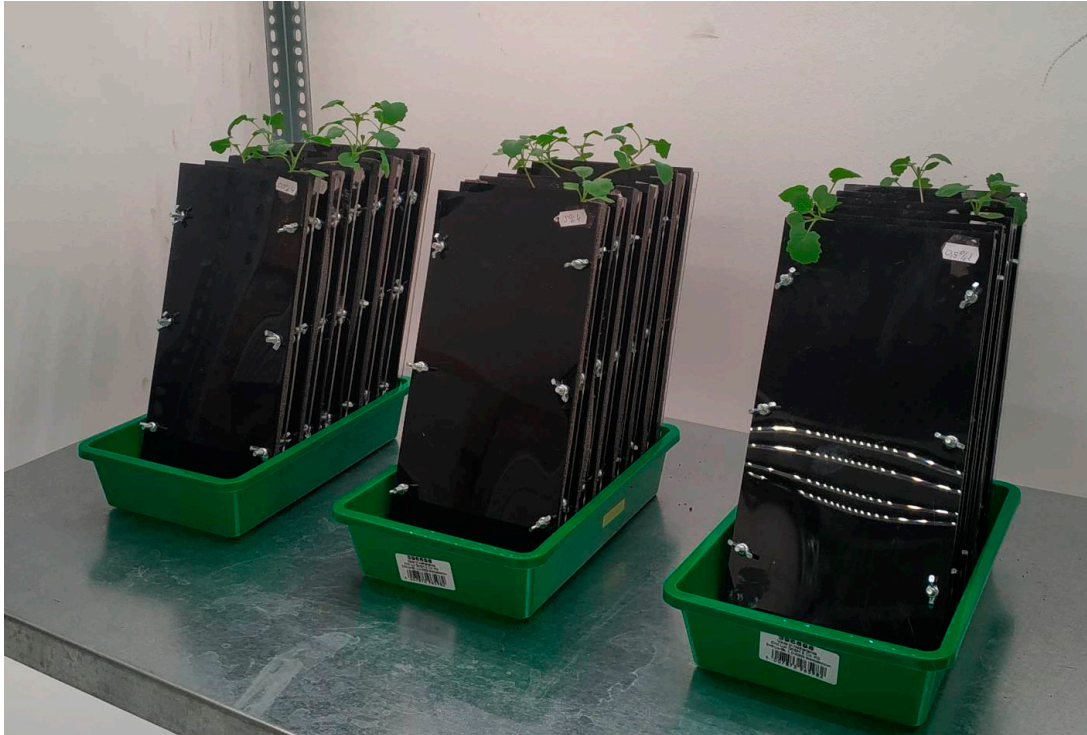

**Figure S1.** Growing conditions for 14 days in the rhizotrons. The rhizotrons were placed at an approximate tilt of 120°-130° to allow the roots of the test plants to grow along the transparent walls, ensuring their visibility and measurability.

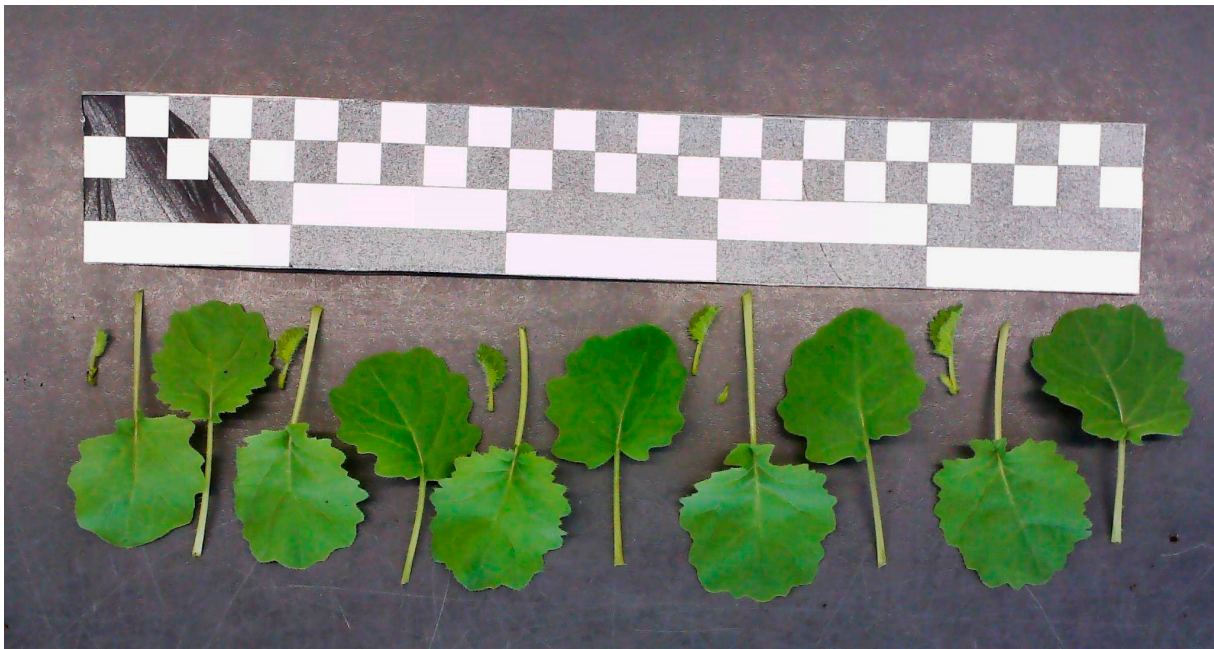

**Figure S2.** To measure the number and area of the leaves, they were scanned (the leaves of the control plants are visible in the image).

**Table S1.** The values of the significant differences of shoot parameters.

| <b>Shoot length</b>                             | <b><i>p</i> value</b> |
|-------------------------------------------------|-----------------------|
| Control vs. False indigo-bush 5%                | 0.0003                |
| False indigo-bush 0.5% vs. False indigo-bush 5% | 0.0226                |
| False indigo-bush 5% vs. Common milkweed 0.5%   | 0.0008                |
| False indigo-bush 5% vs. Common milkweed 1%     | 0.0053                |
| <b>Leaf number</b>                              |                       |
| Control vs. False indigo-bush 5%                | < 0.0001              |
| Control vs. Common milkweed 5%                  | 0.0179                |
| False indigo-bush 0.5% vs. False indigo 5%      | < 0.0001              |
| False indigo-bush 1% vs. False indigo 5%        | 0.0002                |
| False indigo-bush 5% vs. Common milkweed 0.5%   | < 0.0001              |
| False indigo-bush 5% vs. Common milkweed 1%     | 0.0003                |
| False indigo-bush 0.5% vs. Common milkweed 5%   | 0.0283                |
| <b>Leaf area</b>                                |                       |
| False indigo-bush 5% vs. All treatments         | < 0.0001              |

**Table S2.** The values of the significant differences of root parameters.

| <b>Primary root length</b>                      | <b><i>p</i> value</b> |
|-------------------------------------------------|-----------------------|
| Control vs. False indigo-bush 5%                | 0.0006                |
| Control vs. Common milkweed 5%                  | 0.006                 |
| False indigo-bush 0.5% vs. False indigo-bush 5% | 0.0009                |
| False indigo-bush 1% vs. False indigo-bush 5%   | < 0.0001              |
| False indigo-bush 5% vs. Common milkweed 0.5%   | 0.0072                |
| False indigo-bush 0.5% vs. Common milkweed 5%   | 0.006                 |
| False indigo-bush 1% vs. Common milkweed 5%     | 0.0005                |
| Common milkweed 5% vs. Common milkweed 0.5%     | 0.0418                |
| <b>Lateral root number</b>                      |                       |
| Control vs. False indigo-bush 5%                | 0.012                 |
| Control vs. Common milkweed 5%                  | 0.0012                |
| False indigo-bush 5% vs. False indigo-bush 0.5% | < 0.0001              |
| False indigo-bush 5% vs. Common milkweed 0.5%   | 0.0282                |
| False indigo-bush 0.5% vs. Common milkweed 5%   | < 0.0001              |
| False indigo-bush 1% vs. Common milkweed 5%     | 0.0092                |
| Common milkweed 5% vs. Common milkweed 0.5%     | 0.0044                |
| <b>Lateral root density</b>                     |                       |
| False indigo-bush 0.5% vs. Common milkweed 5%   | 0.0033                |
